# Supplementary material for: A novel fluorescent probe based on triphenylamine for detecting sulfur dioxide derivatives
Source: Royal Society of Chemistry journal article supplement (doi:10.1039/d1nj06099f), 2022-01-01
Supplement: d1nj06099f1.pdf [file d1nj06099f1.pdf]

## Supporting Information

### A novel fluorescent probe based on triphenylamine for detecting sulfur dioxide derivatives

Wei Sun <sup>a</sup> • Hanhan Xu <sup>a</sup> • Shuqin Bao <sup>a</sup> • Wenge Yang (✉)<sup>a</sup> • Weiliang Shen <sup>a</sup> • Guoxing Hu <sup>a</sup>

**Corresponding author: Wenge Yang**

E-mail: wengeyang11@163.com

- a. College of Biotechnology and Pharmaceutical Engineering, Nanjing Tech University, No. 30,  
South Puzhu Road, Nanjing 211816, China

### Contents

|                                                                                                                                |   |
|--------------------------------------------------------------------------------------------------------------------------------|---|
| Fig. S1. <sup>1</sup> H NMR spectrum of compound 1.....                                                                        | 2 |
| Fig. S2. <sup>13</sup> C NMR spectrum of compound 1.....                                                                       | 2 |
| Fig. S3. HRMS of compound 1.....                                                                                               | 3 |
| Fig. S4. <sup>1</sup> H NMR spectrum of BLT-SW.....                                                                            | 3 |
| Fig. S5. <sup>13</sup> C NMR spectrum of BLT-SW.....                                                                           | 4 |
| Fig. S6. HRMS of BLT-SW.....                                                                                                   | 5 |
| Determination of quantum yield.....                                                                                            | 5 |
| Table S1. Photophysical properties of BLT-SW and it's product.....                                                             | 6 |
| Fig. S7. <sup>1</sup> H NMR spectrum of BLT-SW + SO <sub>3</sub> <sup>2-</sup> .....                                           | 6 |
| Fig. S8. HRMS of BLT-SW+SO <sub>3</sub> <sup>2-</sup> .....                                                                    | 6 |
| Fig. S9. Fluorescence Job's plot for the determination of stoichiometry between BLT-SW and SO <sub>3</sub> <sup>2-</sup> ..... | 7 |

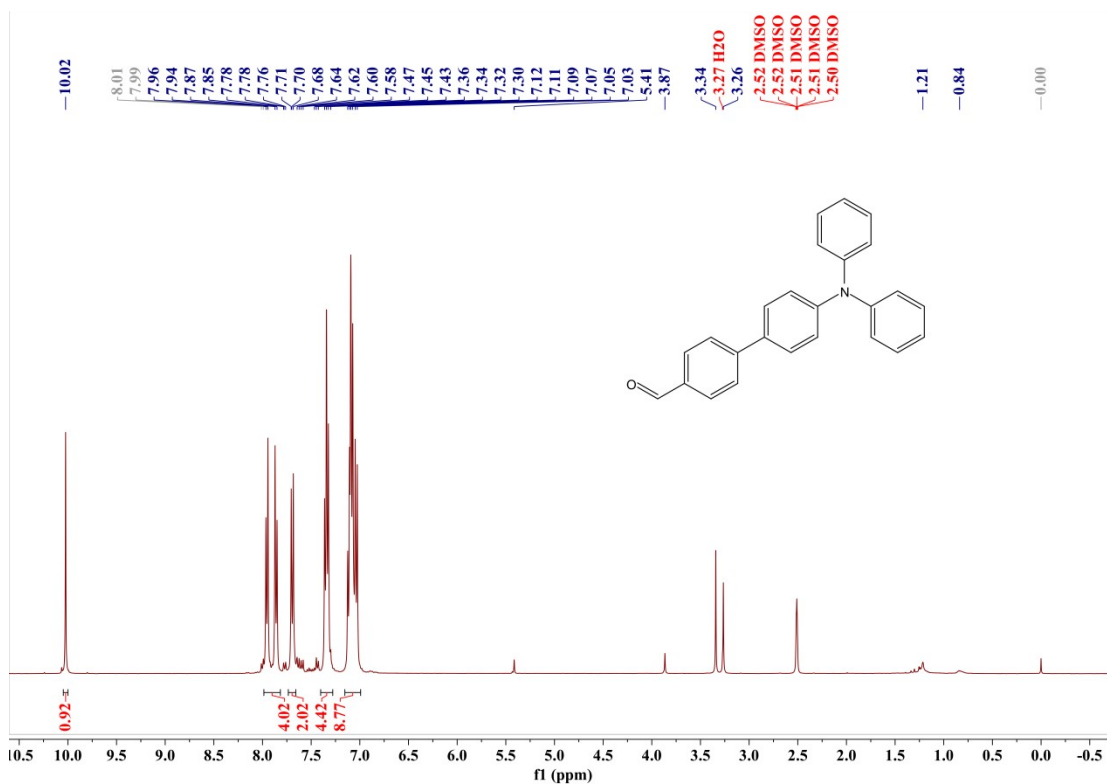

Fig. S1.  $^1\text{H NMR}$  spectrum of compound 1. (DMSO- $d_6$ , 400 MHz).

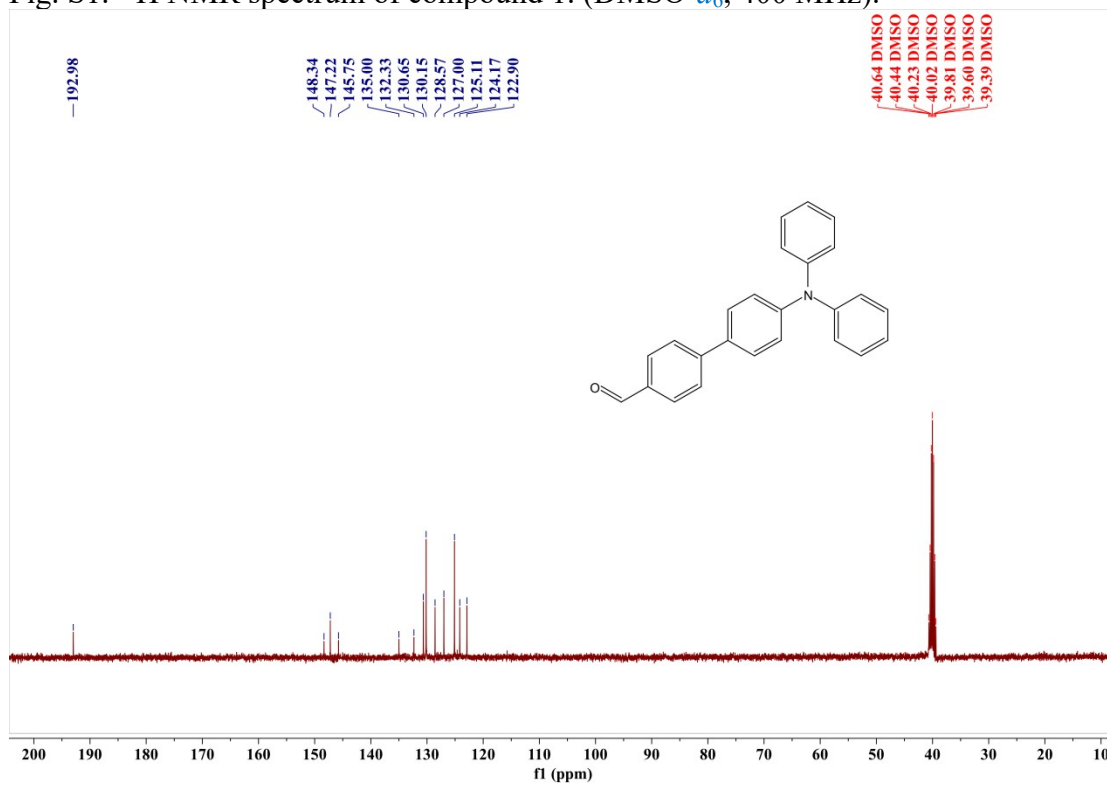

Fig. S2.  $^{13}\text{C NMR}$  spectrum of compound 1. (DMSO- $d_6$ , 101 MHz).

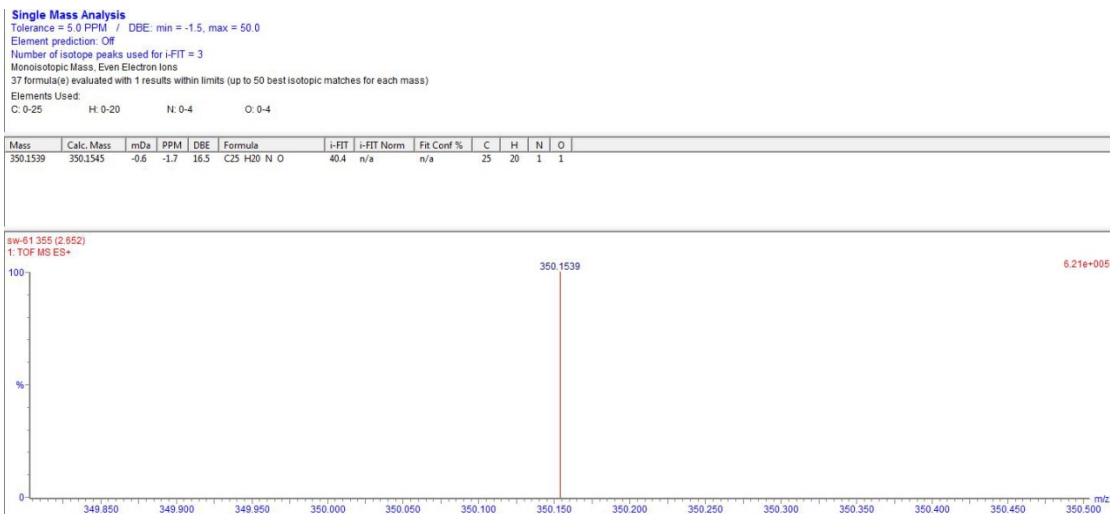

Fig. S3. HRMS of compound 1.

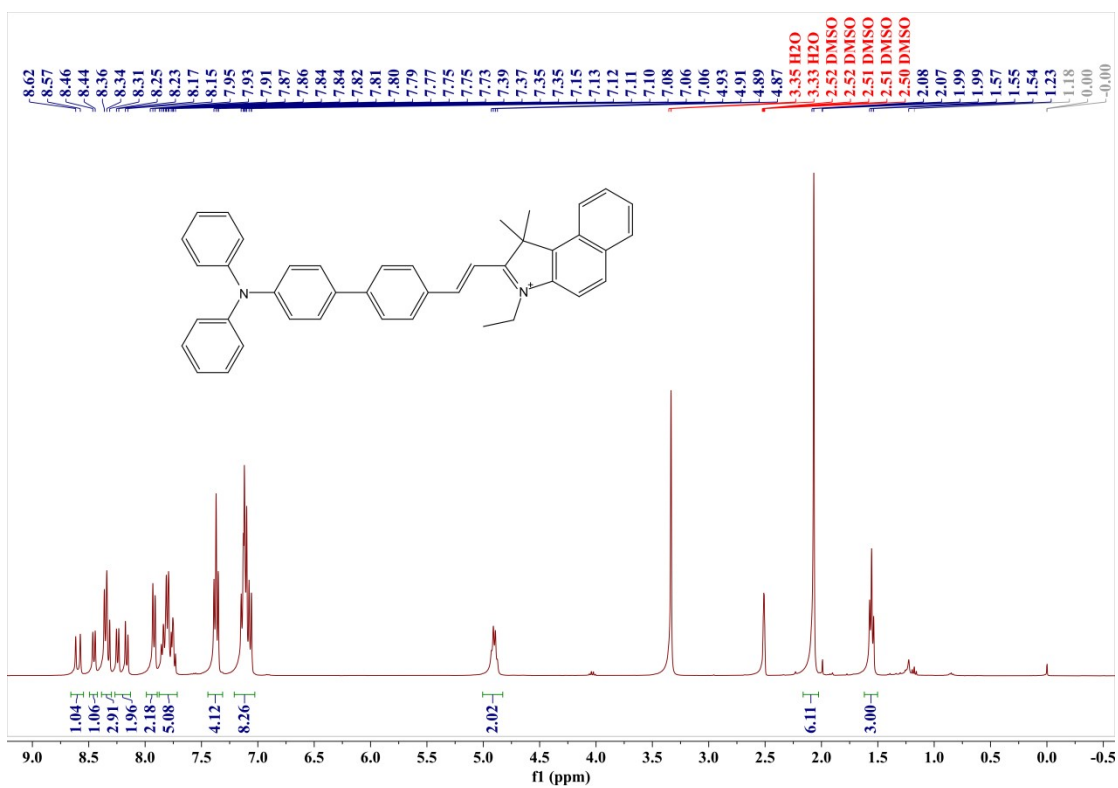

Fig. S4. <sup>1</sup>H NMR spectrum of BLT-SW (DMSO-*d*<sub>6</sub>, 400 MHz).

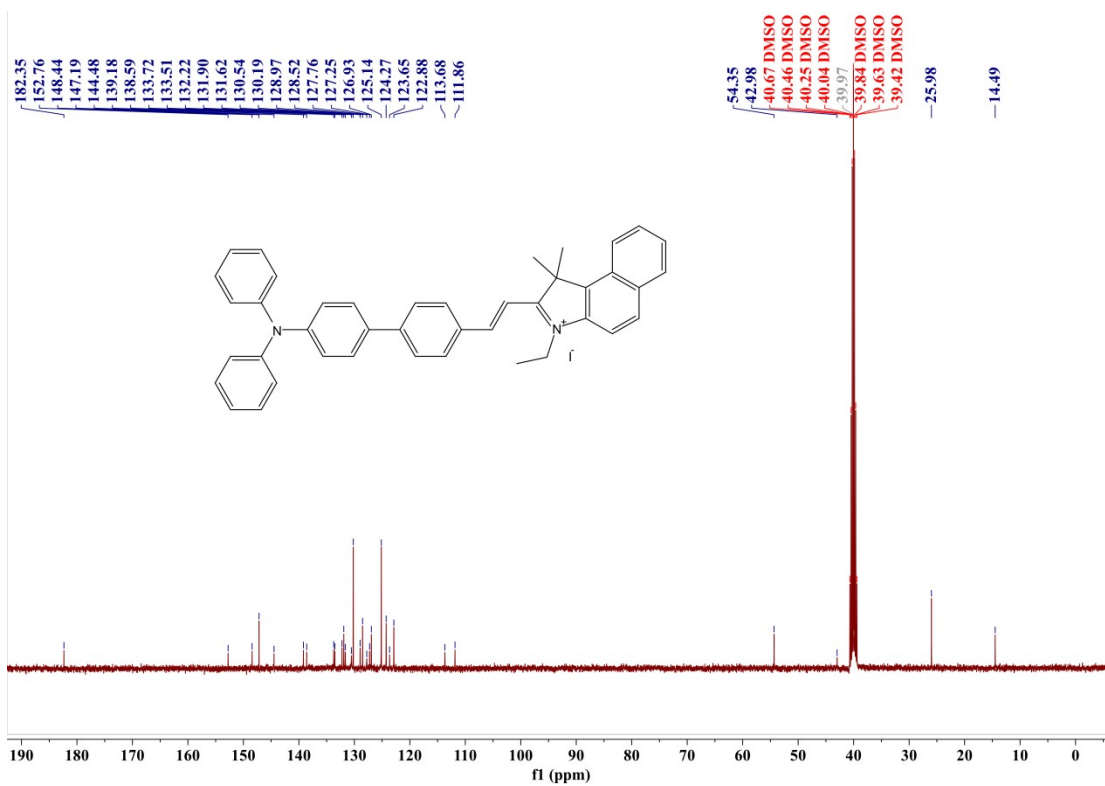

Fig. S5. <sup>13</sup>C NMR spectrum of BLT-SW (DMSO-*d*<sub>6</sub>, 101 MHz).

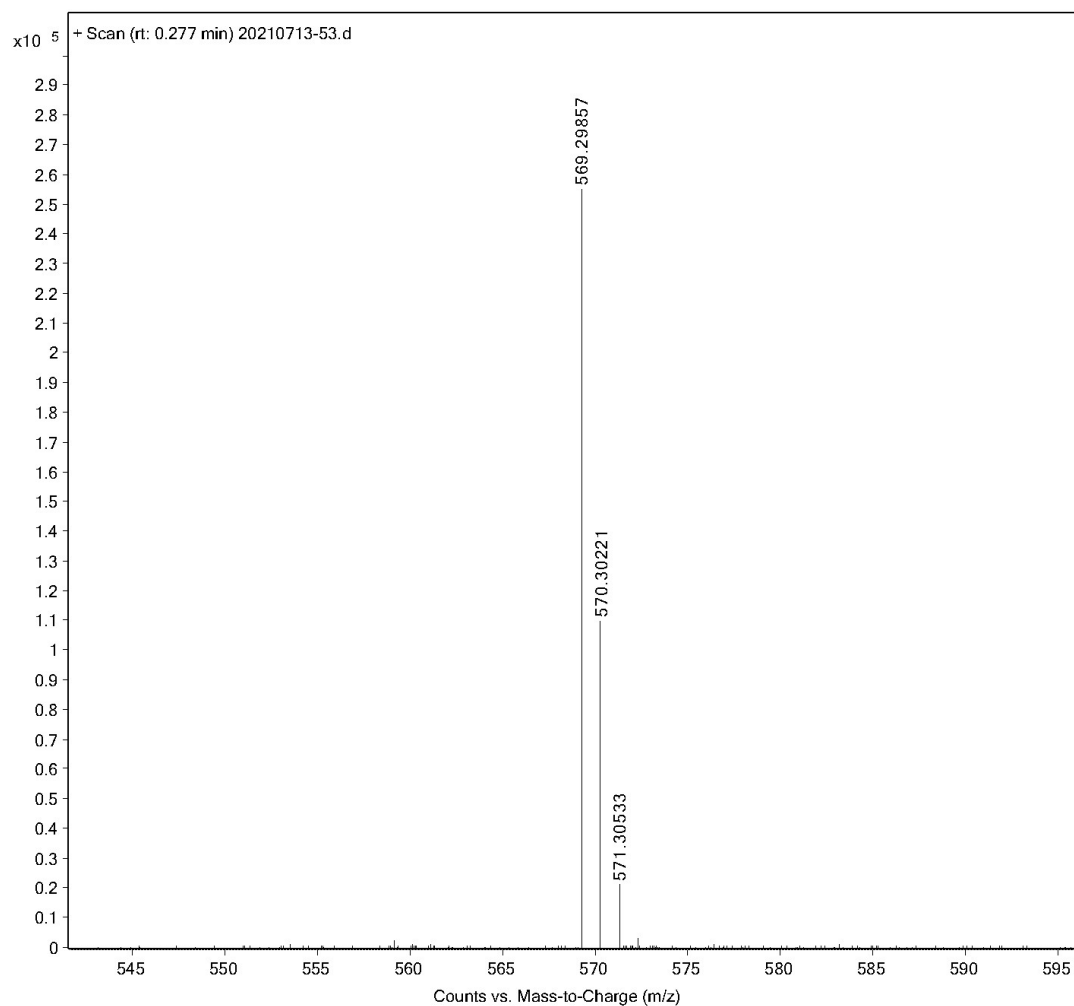

Fig. S6. HRMS of BLT-SW.

### Determination of quantum yield

Fluorescence quantum yield of probe A1-A6 and their products were determined in PBS solution (10 mM, pH = 7.4) with optically matching solutions of fluorescein ( $\Phi = 0.79$  in 0.1 M NaOH solution) as the standard and the quantum yield was calculated using the following equation:

$$\Phi_s = \Phi_r (A_r F_s / A_s F_r) (n_s^2 / n_r^2)^2$$

Where, s and r denote sample and reference, respectively. A is the absorbance. F is the relative integrated fluorescence intensity and n is the refractive index of the solvent.

Table S1. Photophysical properties of BLT-SW and it's product

| Compound                             | Quantum yield |
|--------------------------------------|---------------|
| BLT-SW                               | 0.019         |
| BLT-SW+SO <sub>3</sub> <sup>2-</sup> | 0.471         |

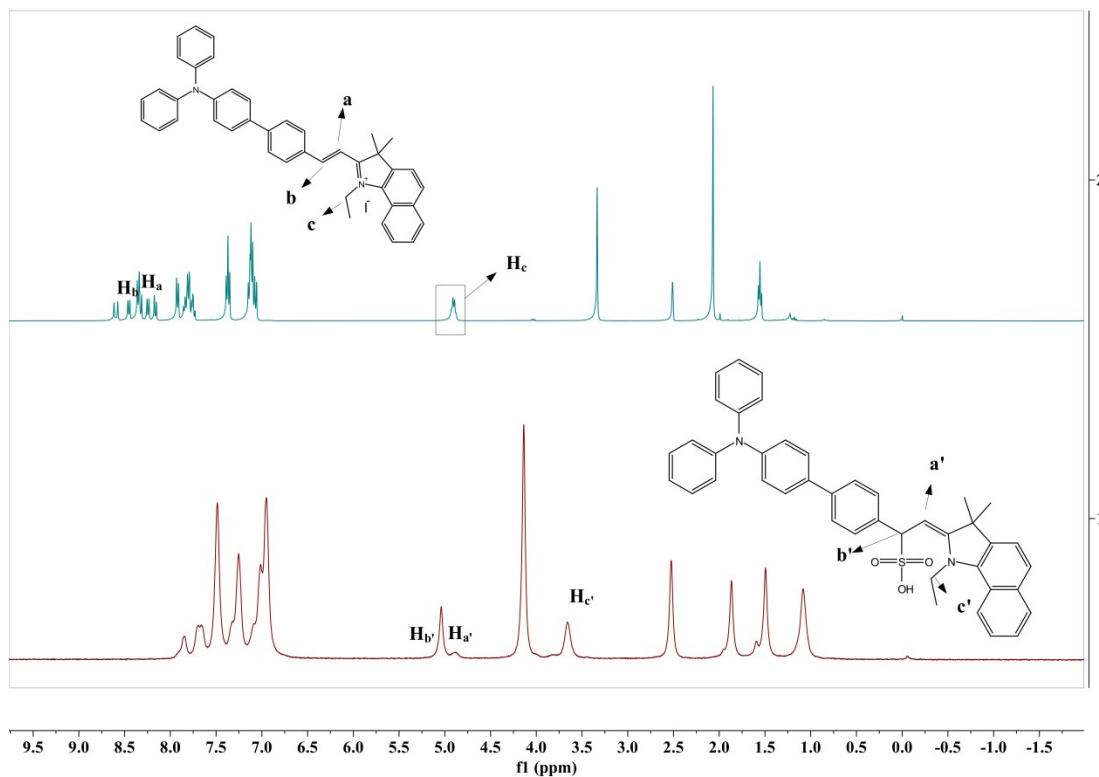

Fig. S7. <sup>1</sup>H NMR spectrum of BLT-SW + SO<sub>3</sub><sup>2-</sup> in DMSO-*d*<sub>6</sub>-D<sub>2</sub>O(4:1).

**Single Mass Analysis**

Tolerance = 5.0 mDa / DBE: min = -1.5, max = 50.0  
 Element prediction: Off  
 Number of isotope peaks used for i-FIT = 3  
 Monoisotopic Mass, Even Electron Ions  
 9 formula(e) evaluated with 0 results within limits (up to 50 best isotopic matches for each mass)  
 Elements Used:  
 C: 39-43 H: 30-39 N: 1-3 O: 1-3 S: 0-2

| Mass     | Calc. Mass | mDa | PPM | DBE | Formula | i-FIT | i-FIT Norm | Fit Conf % | C | H | N | O | S |
|----------|------------|-----|-----|-----|---------|-------|------------|------------|---|---|---|---|---|
| 650.2616 | ---        |     |     |     |         |       |            |            |   |   |   |   |   |

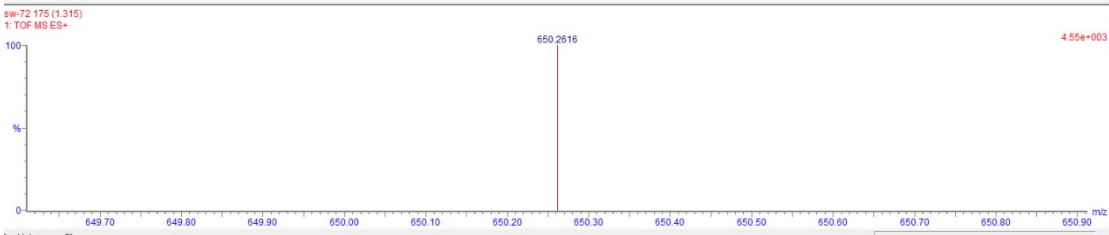

Fig. S8. HRMS of BLT-SW+SO<sub>3</sub><sup>2-</sup>.

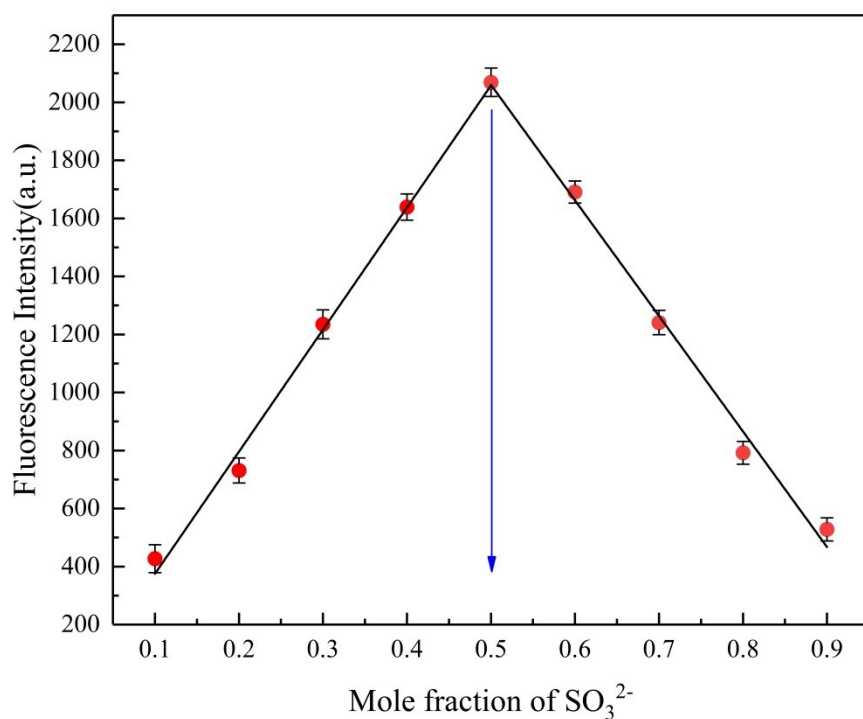

Fig. S9. Fluorescence Job's plot for the determination of stoichiometry between BLT-SW and SO<sub>3</sub><sup>2-</sup> in PBS-DMSO (10 mM, pH = 7.4, 1% DMSO), the total concentration of [BLT-SW] + [SO<sub>3</sub><sup>2-</sup>] = 40μM.

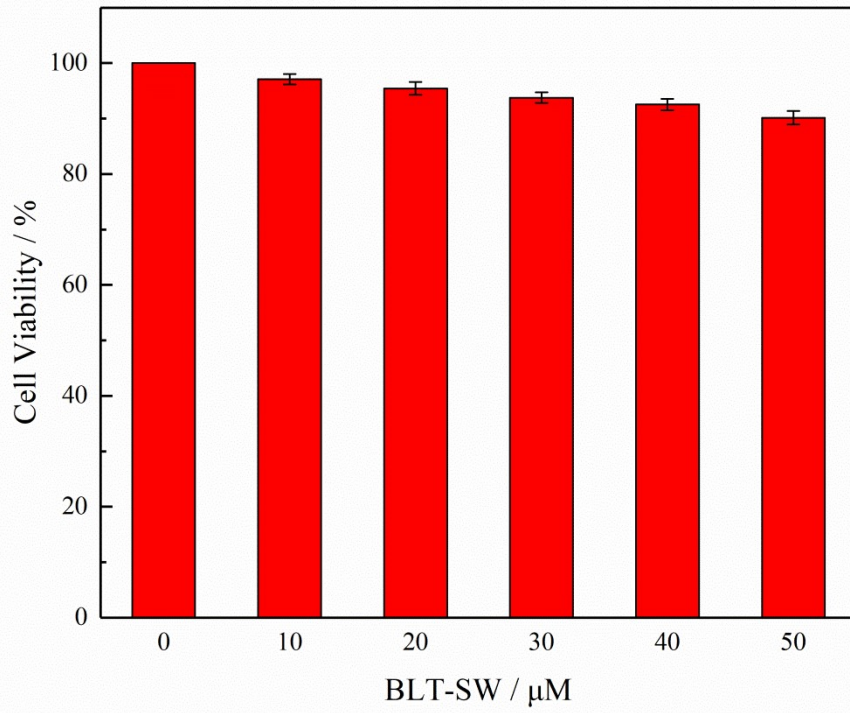

Fig. S10. MTT assay of HepG-2 cells with BLT-SW at different concentration (0-50  $\mu\text{M}$ ) for 24 hours.



Table S2: Comparison of the characteristics with reported sensors for SO<sub>2</sub> derivatives

| Probe                                                                                                                         | water solubility       | Response time | LOD (M)                 | Cell imaging | test strips | Actual sample testing |
|-------------------------------------------------------------------------------------------------------------------------------|------------------------|---------------|-------------------------|--------------|-------------|-----------------------|
| 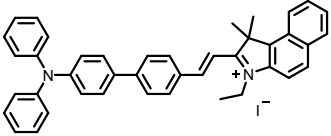 <p>This work</p>                            | 1% DMSO in PBS         | 5 min         | $2.75 \times 10^{-6}$   | Yes          | Yes         | Yes                   |
|  <p>Talanta. 2019, 191, 428-434</p>          | EtOH/PBS 4:6           | 30 min        | $2.6 \times 10^{-8}$    | Yes          | No          | No                    |
|  <p>J. Mater. Chem. B, 2017,5, 3862-3869</p> | /                      | 15 S          | $2.2 \times 10^{-8}$    | Yes          | No          | No                    |
|  <p>Chem. Commun., 2016,52, 10381-10384</p> | 100% aqueous           | 140 S         | $1.06 \times 10^{-7}$ M | Yes          | No          | No                    |
|  <p>Anal. Methods, 2021, 13, 3667</p>      | DMF/Tris (v/v = 1 : 1) | 3 min         | $3.19 \times 10^{-8}$   | Yes          | No          | No                    |
